# Supplementary material for: Transcriptional profiling of pediatric cholestatic livers identifies three distinct macrophage populations
Source: PubMed Central journal article supplement (PMC7790256; doi:10.1371/journal.pone.0244743), 2021-01-07

A.

|             | Gender | Age at OLT | TB (mg/dL)  | DB (mg/dL) | GGT (IU/L) | AST (IU/L) | ALT (IU/L) | INR       | Platelets (10 <sup>3</sup> cells/ $\mu$ L) | Estimated Number of Cells | Median UMI Counts/Cell | Median Genes/Cell | Reads Mapped to Genome | Fraction of Reads in Cells |
|-------------|--------|------------|-------------|------------|------------|------------|------------|-----------|--------------------------------------------|---------------------------|------------------------|-------------------|------------------------|----------------------------|
| <b>ALGS</b> | M      | 22 mos     | 17.8        | 12.9       | 411        | 381        | 375        | 1.1       | 301                                        | 5,027                     | 950                    | 444               | 92.8%                  | 87.8%                      |
| <b>BASM</b> | F      | 6 mos      | 15.3 (25.5) | 4.2 (16.2) | 24         | 307        | 118        | 1.6 (3.9) | 155                                        | 2,633                     | 1,695                  | 636               | 96.4%                  | 86.1%                      |
| <b>iBA</b>  | F      | 10 mos     | 17.1        | 11.4       | 34         | 269        | 134        | 1.3       | 221                                        | 5,927                     | 4,742                  | 1,753             | 90.9%                  | 91.2%                      |
| <b>NC</b>   | F      | 133 mos    | 0.7         | <0.2       | 53         | 104        | 74         | 1.3       | 278                                        | 4,691                     | 4,600                  | 1,617             | 92.9%                  | 89.3%                      |

B. **ALGS**

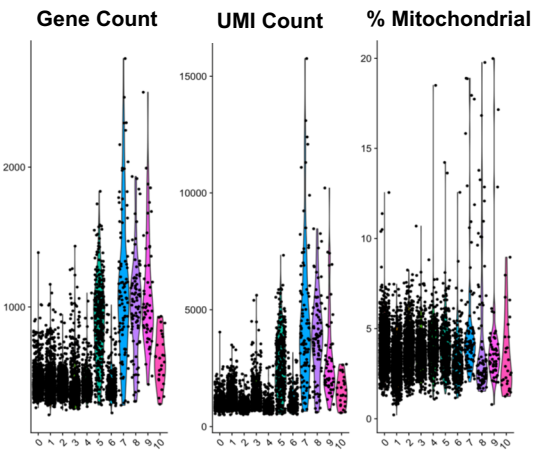

**BASM**

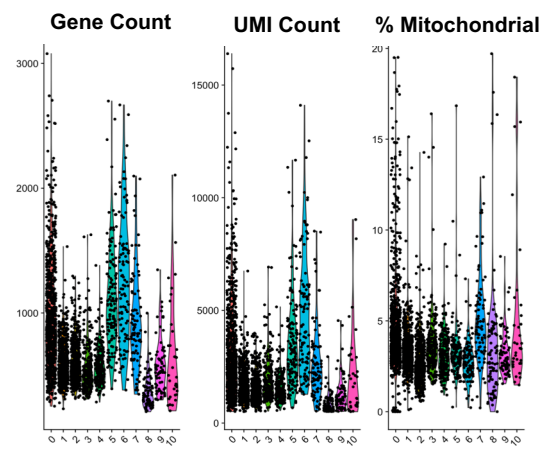

**iBA**

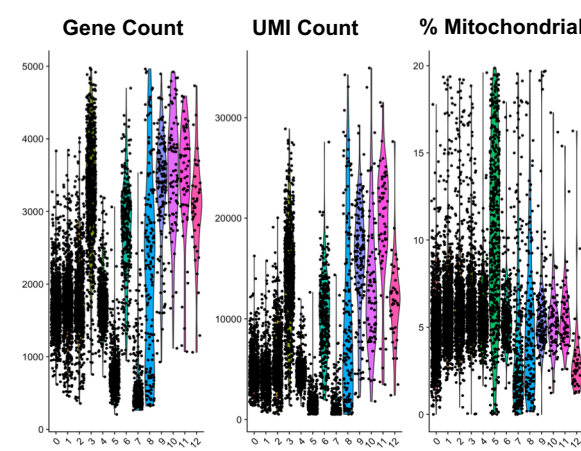

**NC**

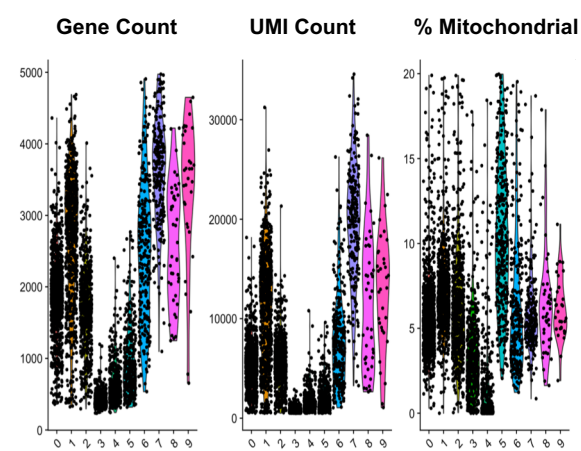

C. **ALGS**

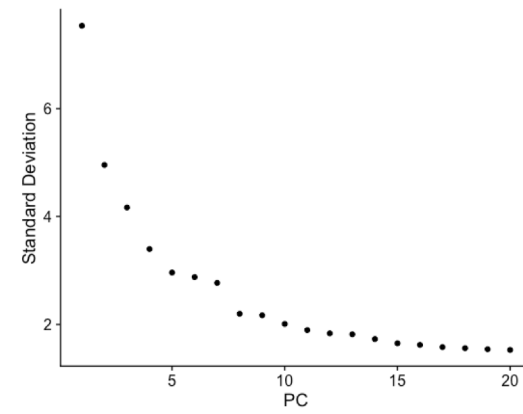

**BASM**

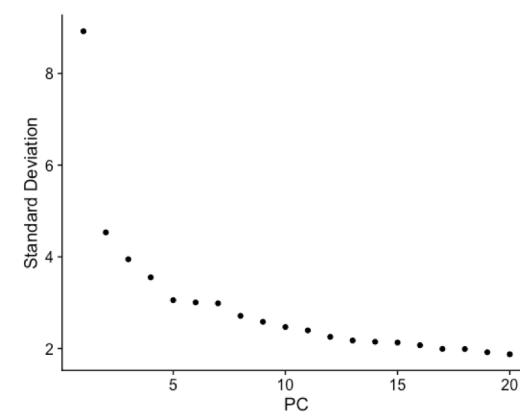

**iBA**

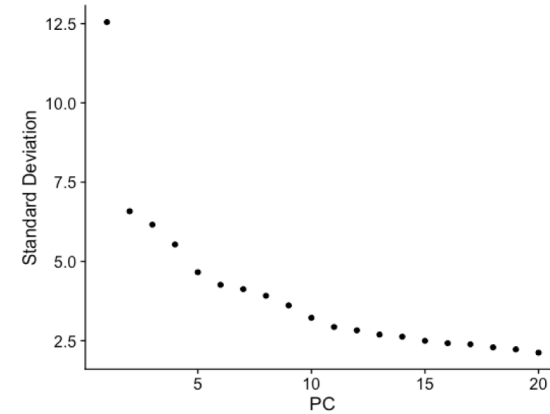

**NC**

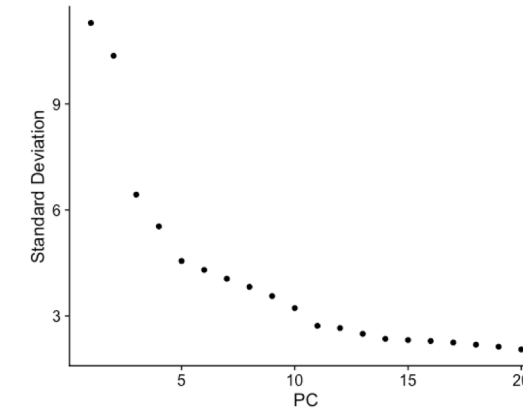

Supplement: pone.0244743.s002.pdf [file pone.0244743.s002.pdf]
