# Supplementary material for: Transcriptional profiling of pediatric cholestatic livers identifies three distinct macrophage populations
Source: PubMed Central journal article supplement (PMC7790256; doi:10.1371/journal.pone.0244743), 2021-01-07

### A. ALGS

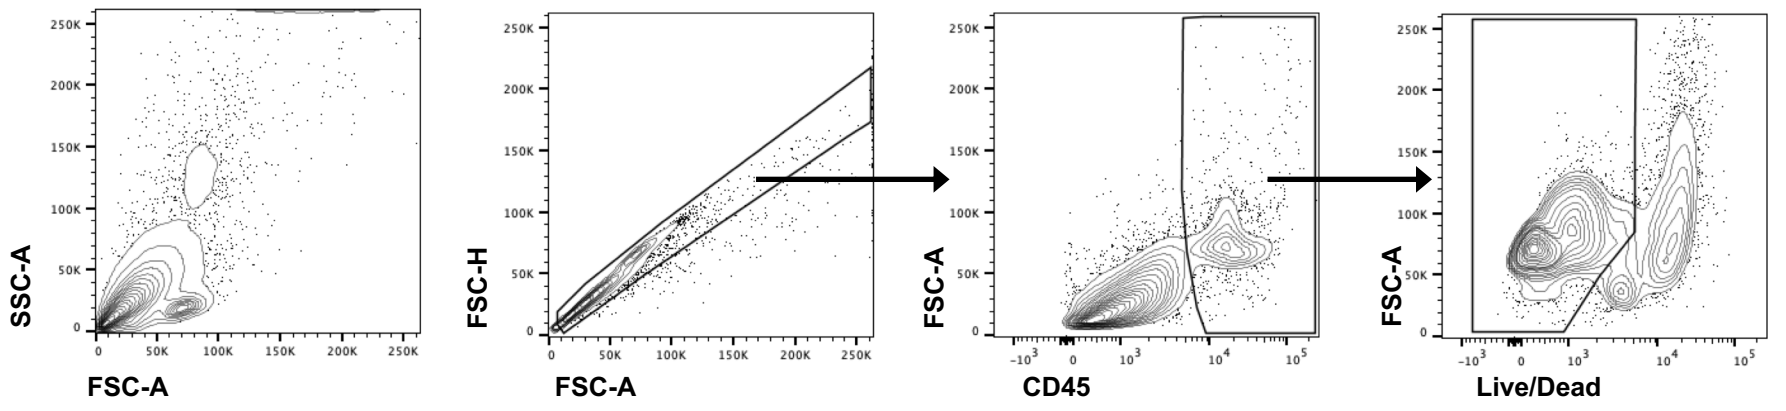

### B. BASM

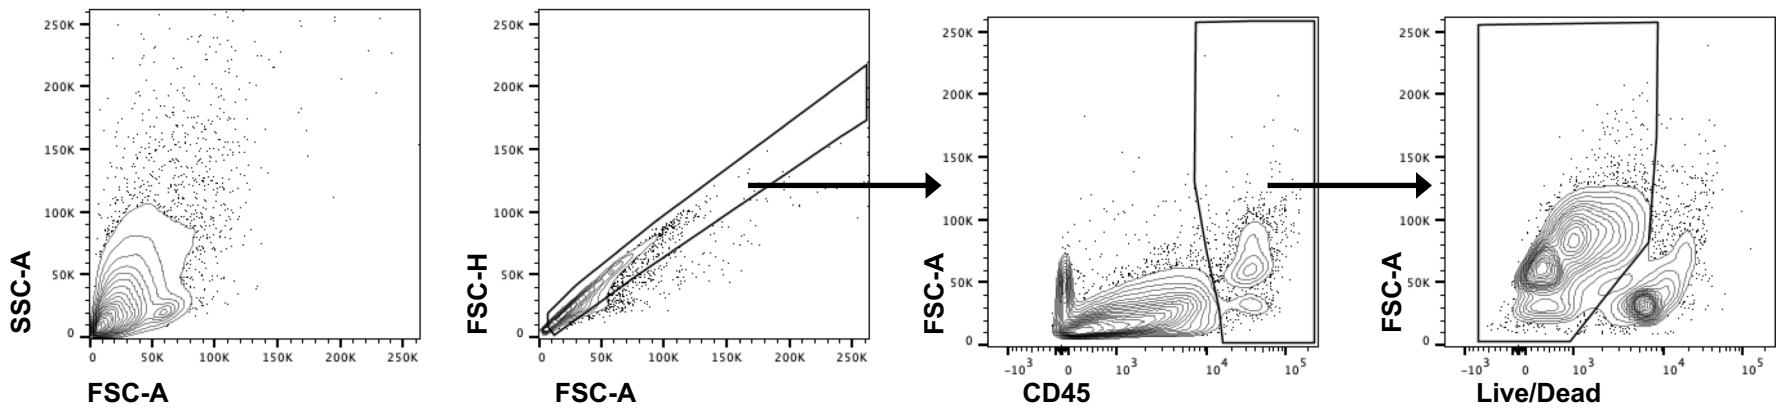

### C. iBA

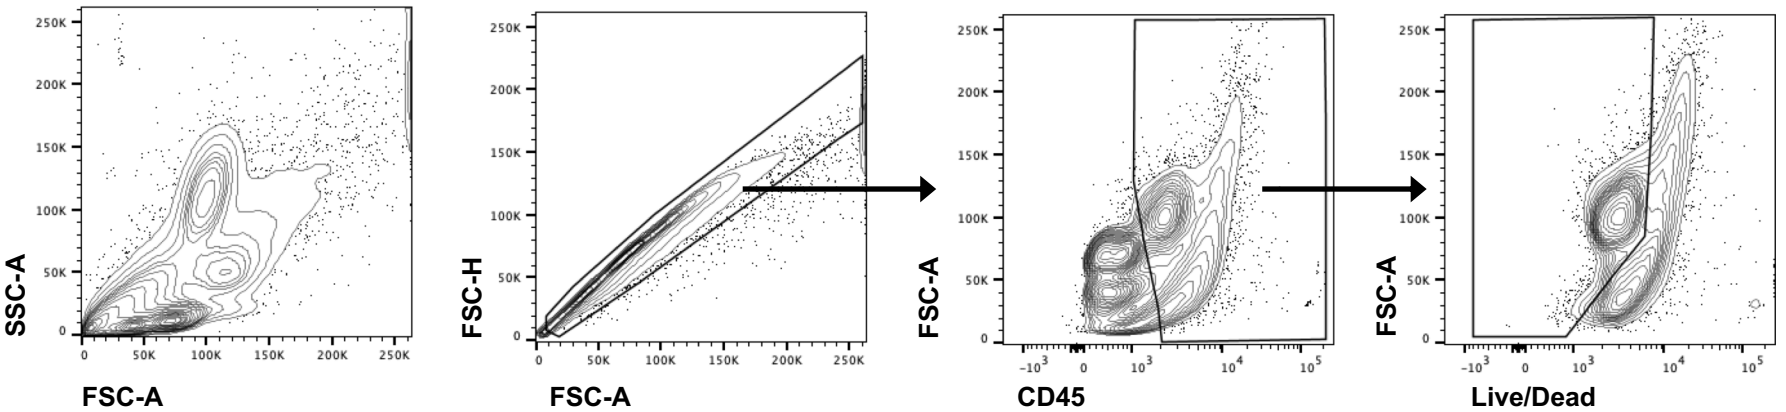

### D. NC

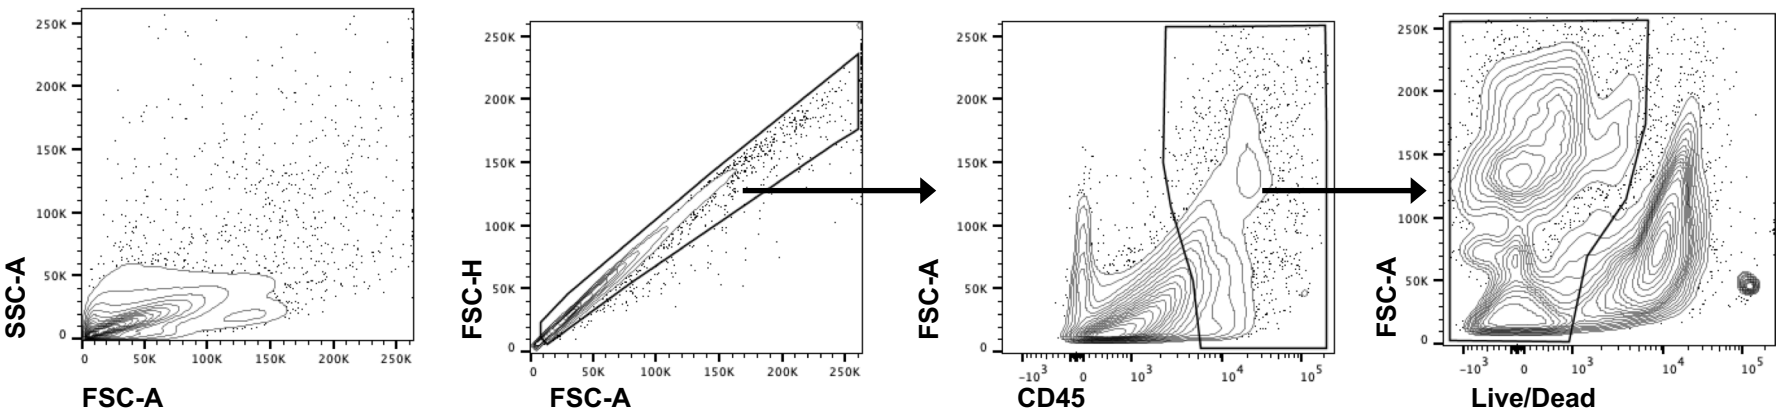

Supplement: pone.0244743.s001.pdf [file pone.0244743.s001.pdf]
