# Supplementary material for: Transcriptional profiling of pediatric cholestatic livers identifies three distinct macrophage populations
Source: PubMed Central journal article supplement (PMC7790256; doi:10.1371/journal.pone.0244743), 2021-01-07

## A. ALGS

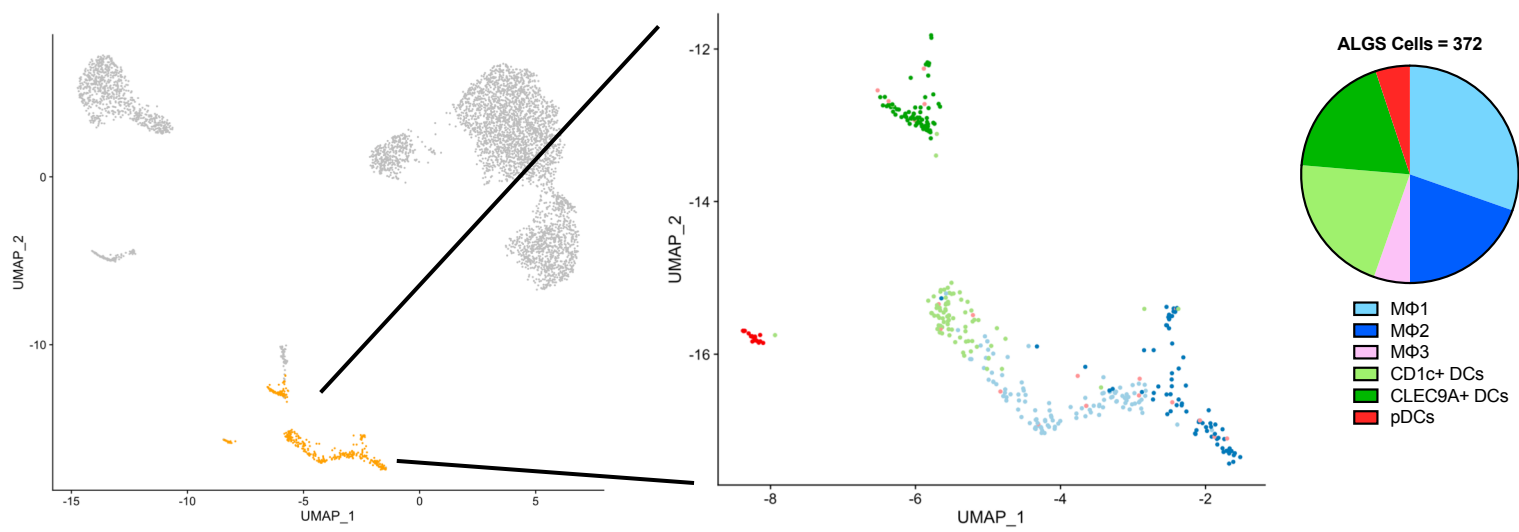

## B. BASM

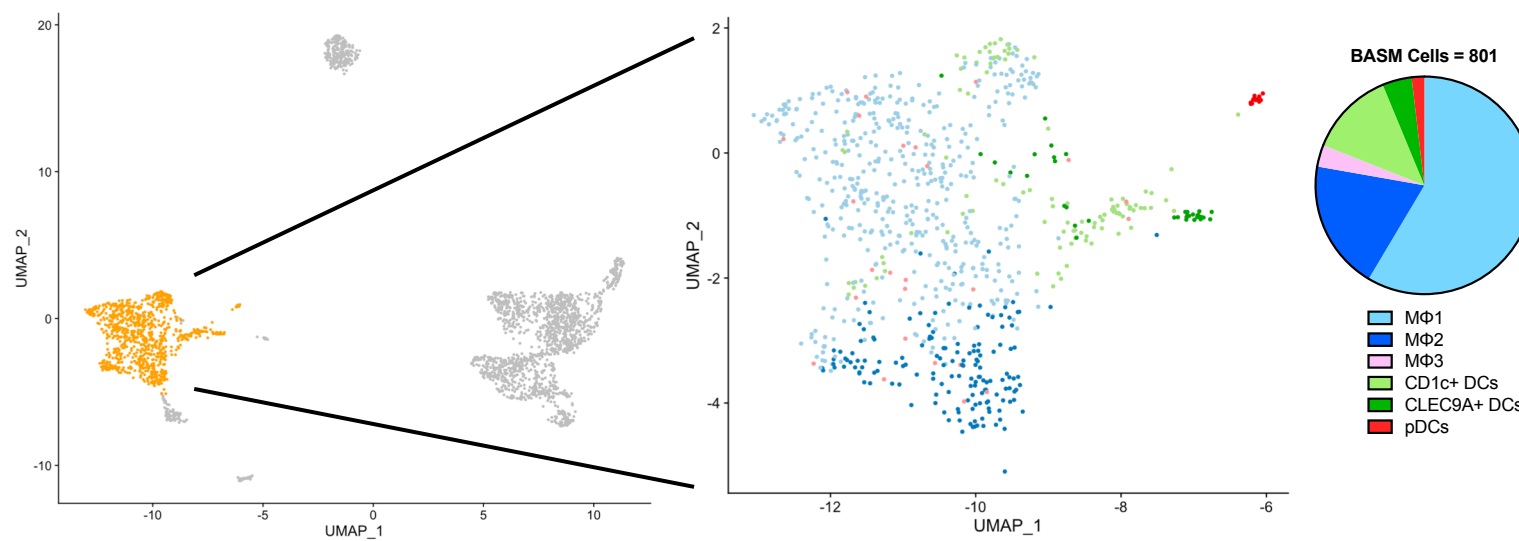

## C. iBA

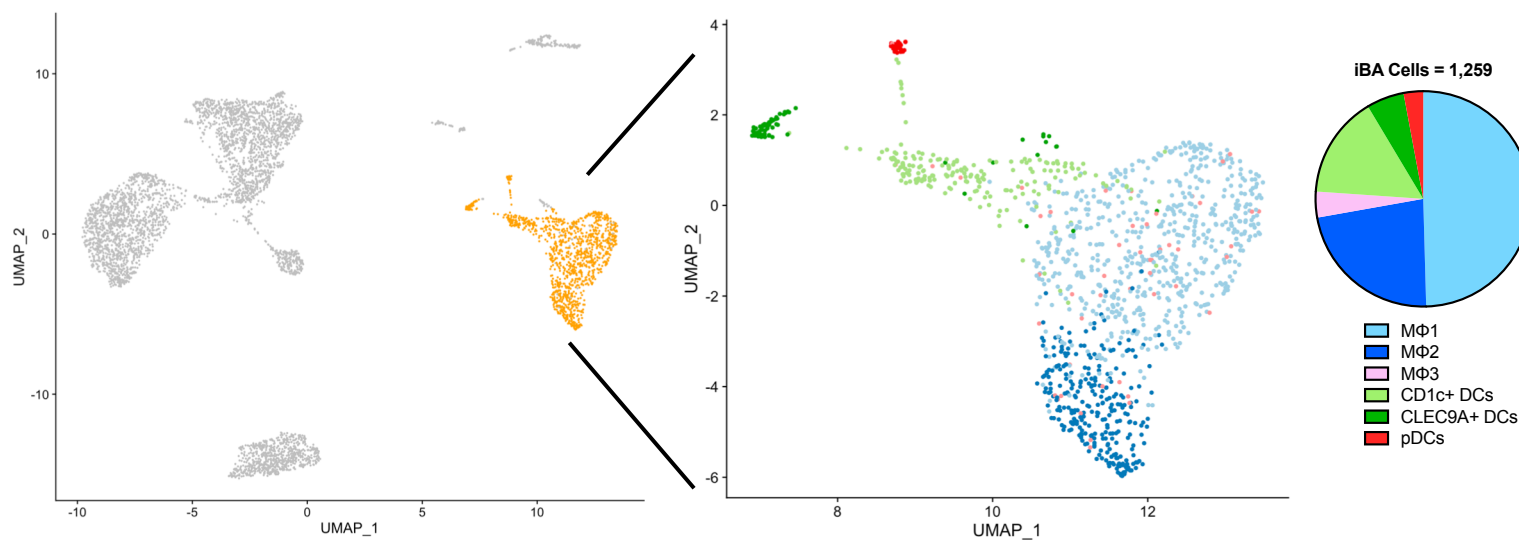

## D. Cholestatic Myeloid

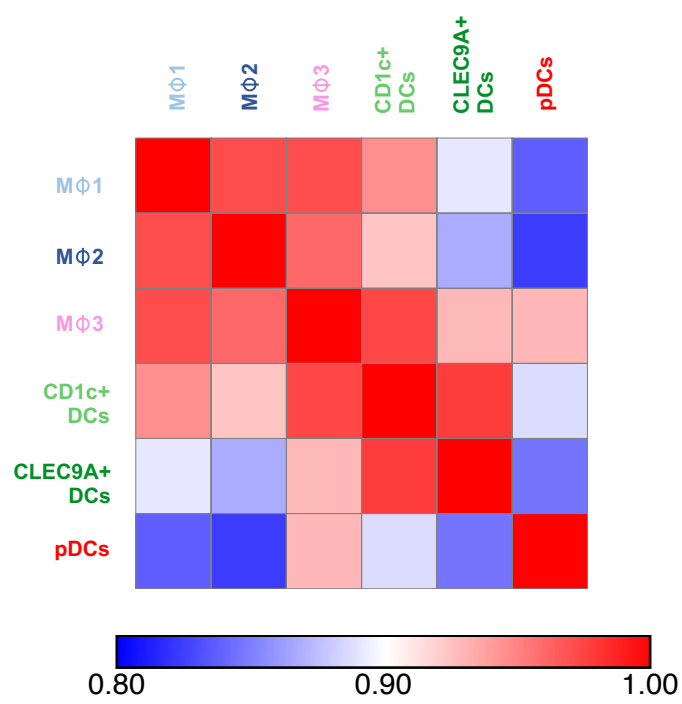

Supplement: pone.0244743.s004.pdf [file pone.0244743.s004.pdf]
