# Supplementary material for: Transcriptional profiling of pediatric cholestatic livers identifies three distinct macrophage populations
Source: PubMed Central journal article supplement (PMC7790256; doi:10.1371/journal.pone.0244743), 2021-01-07

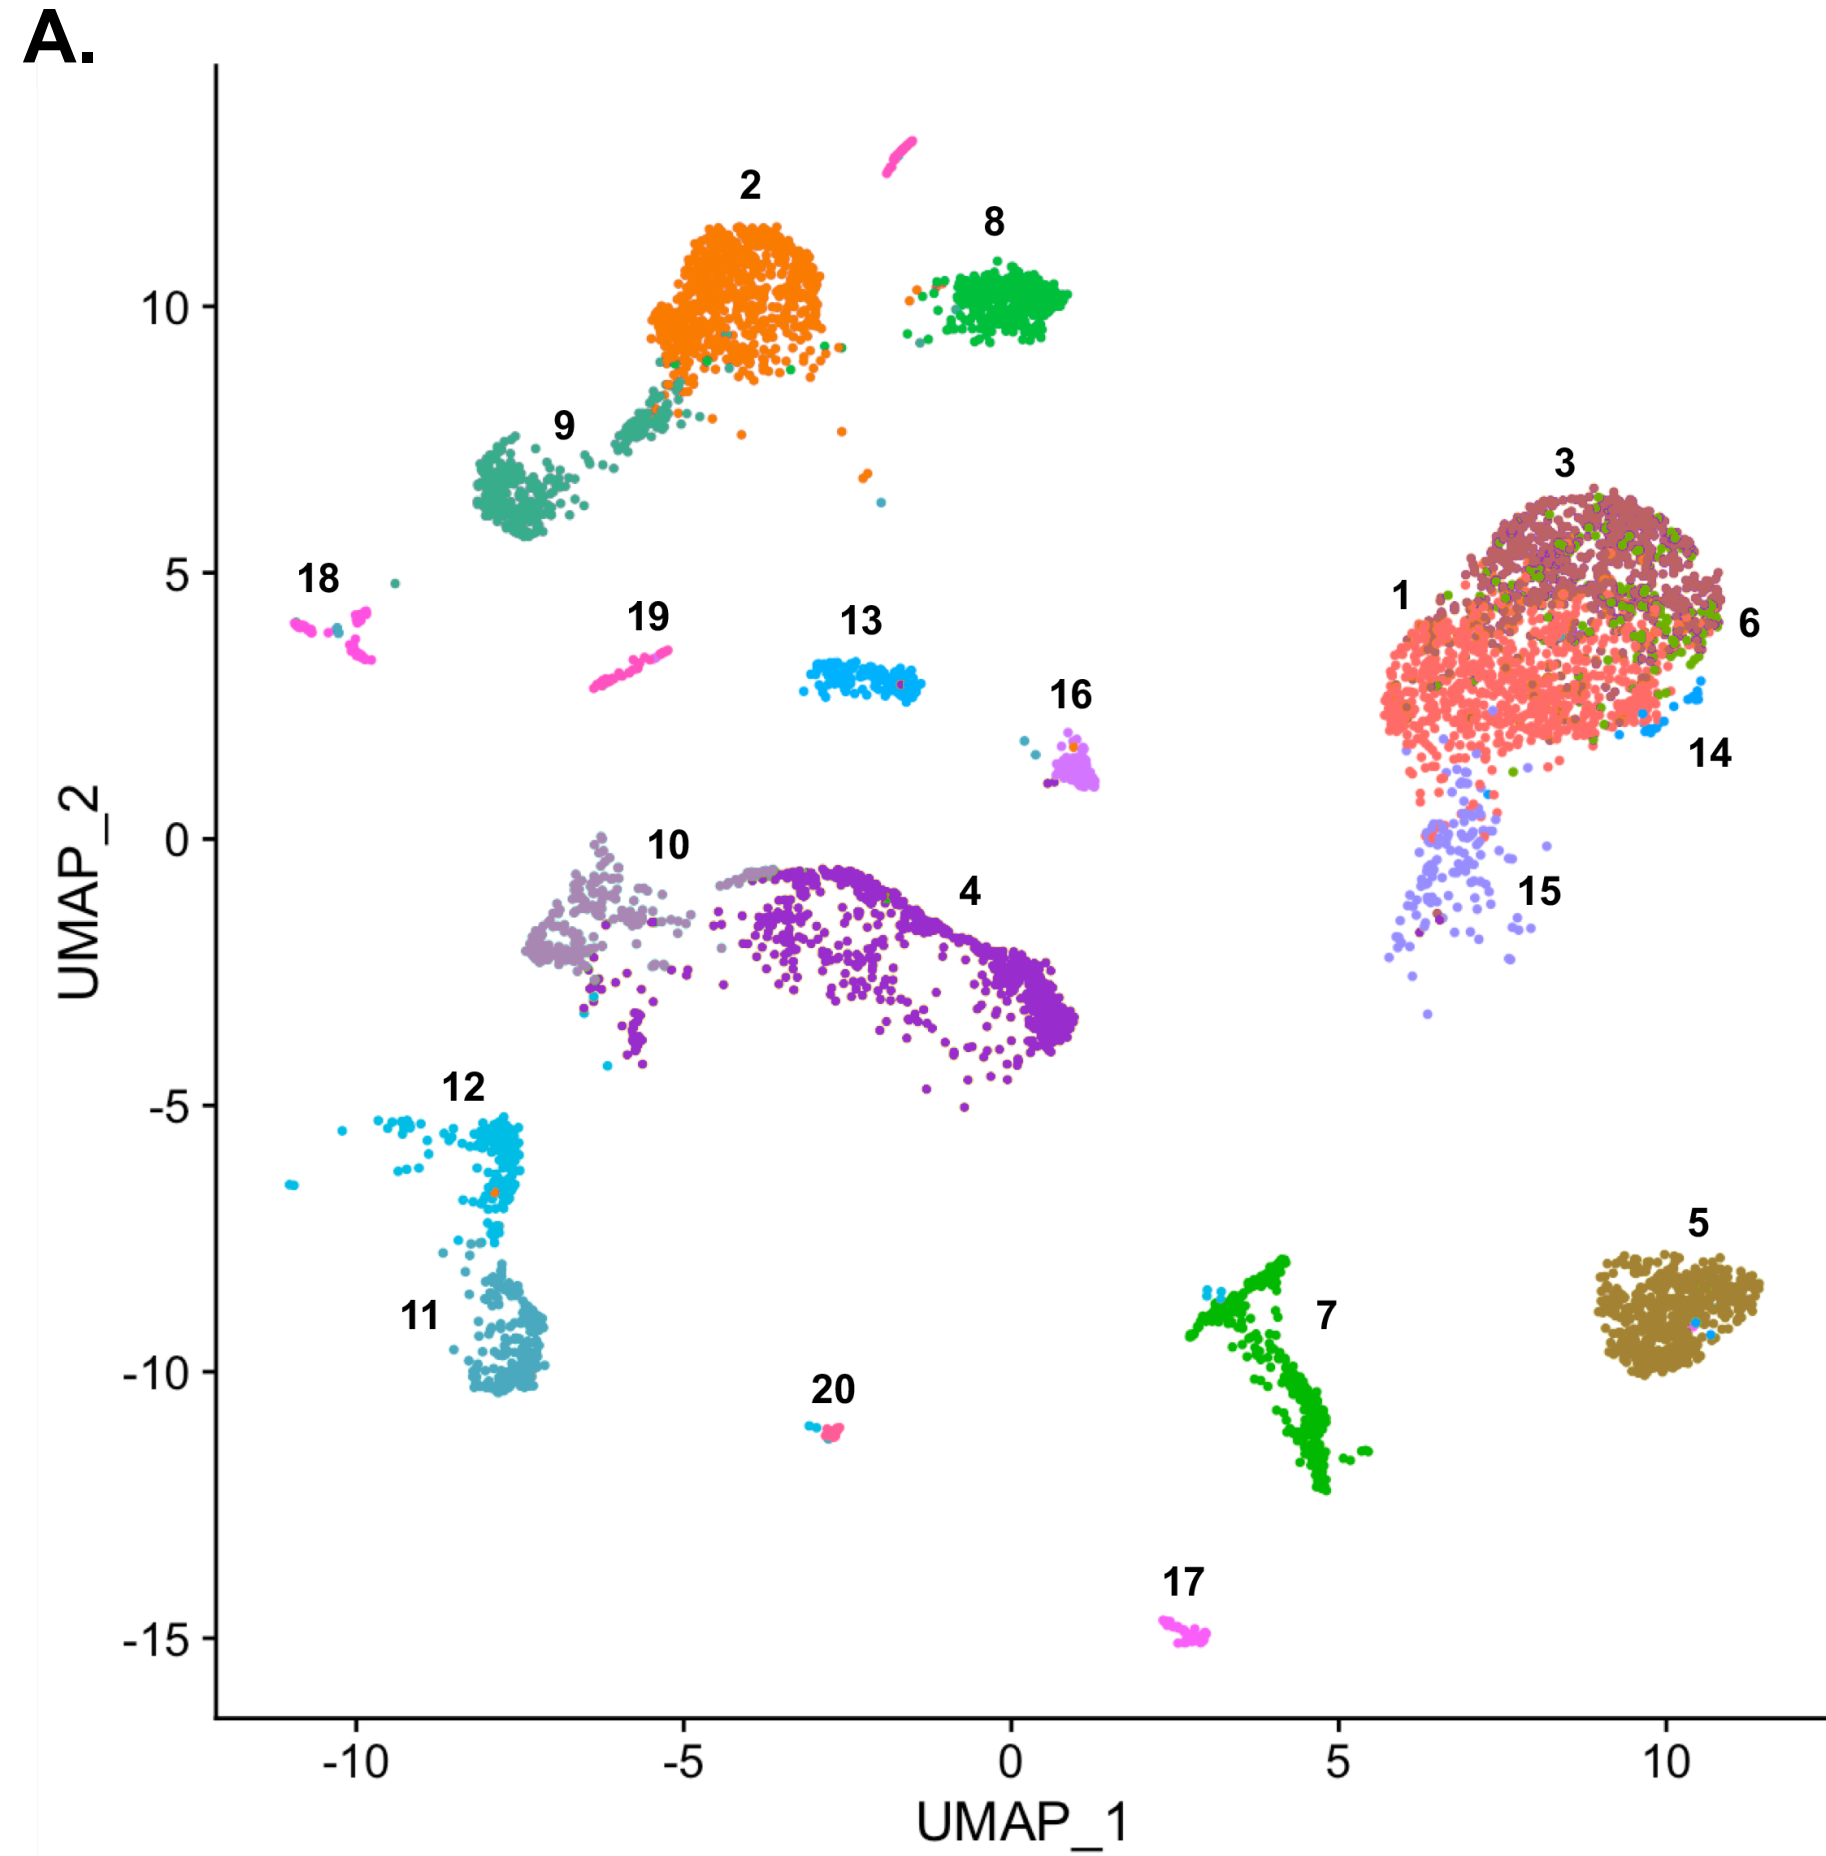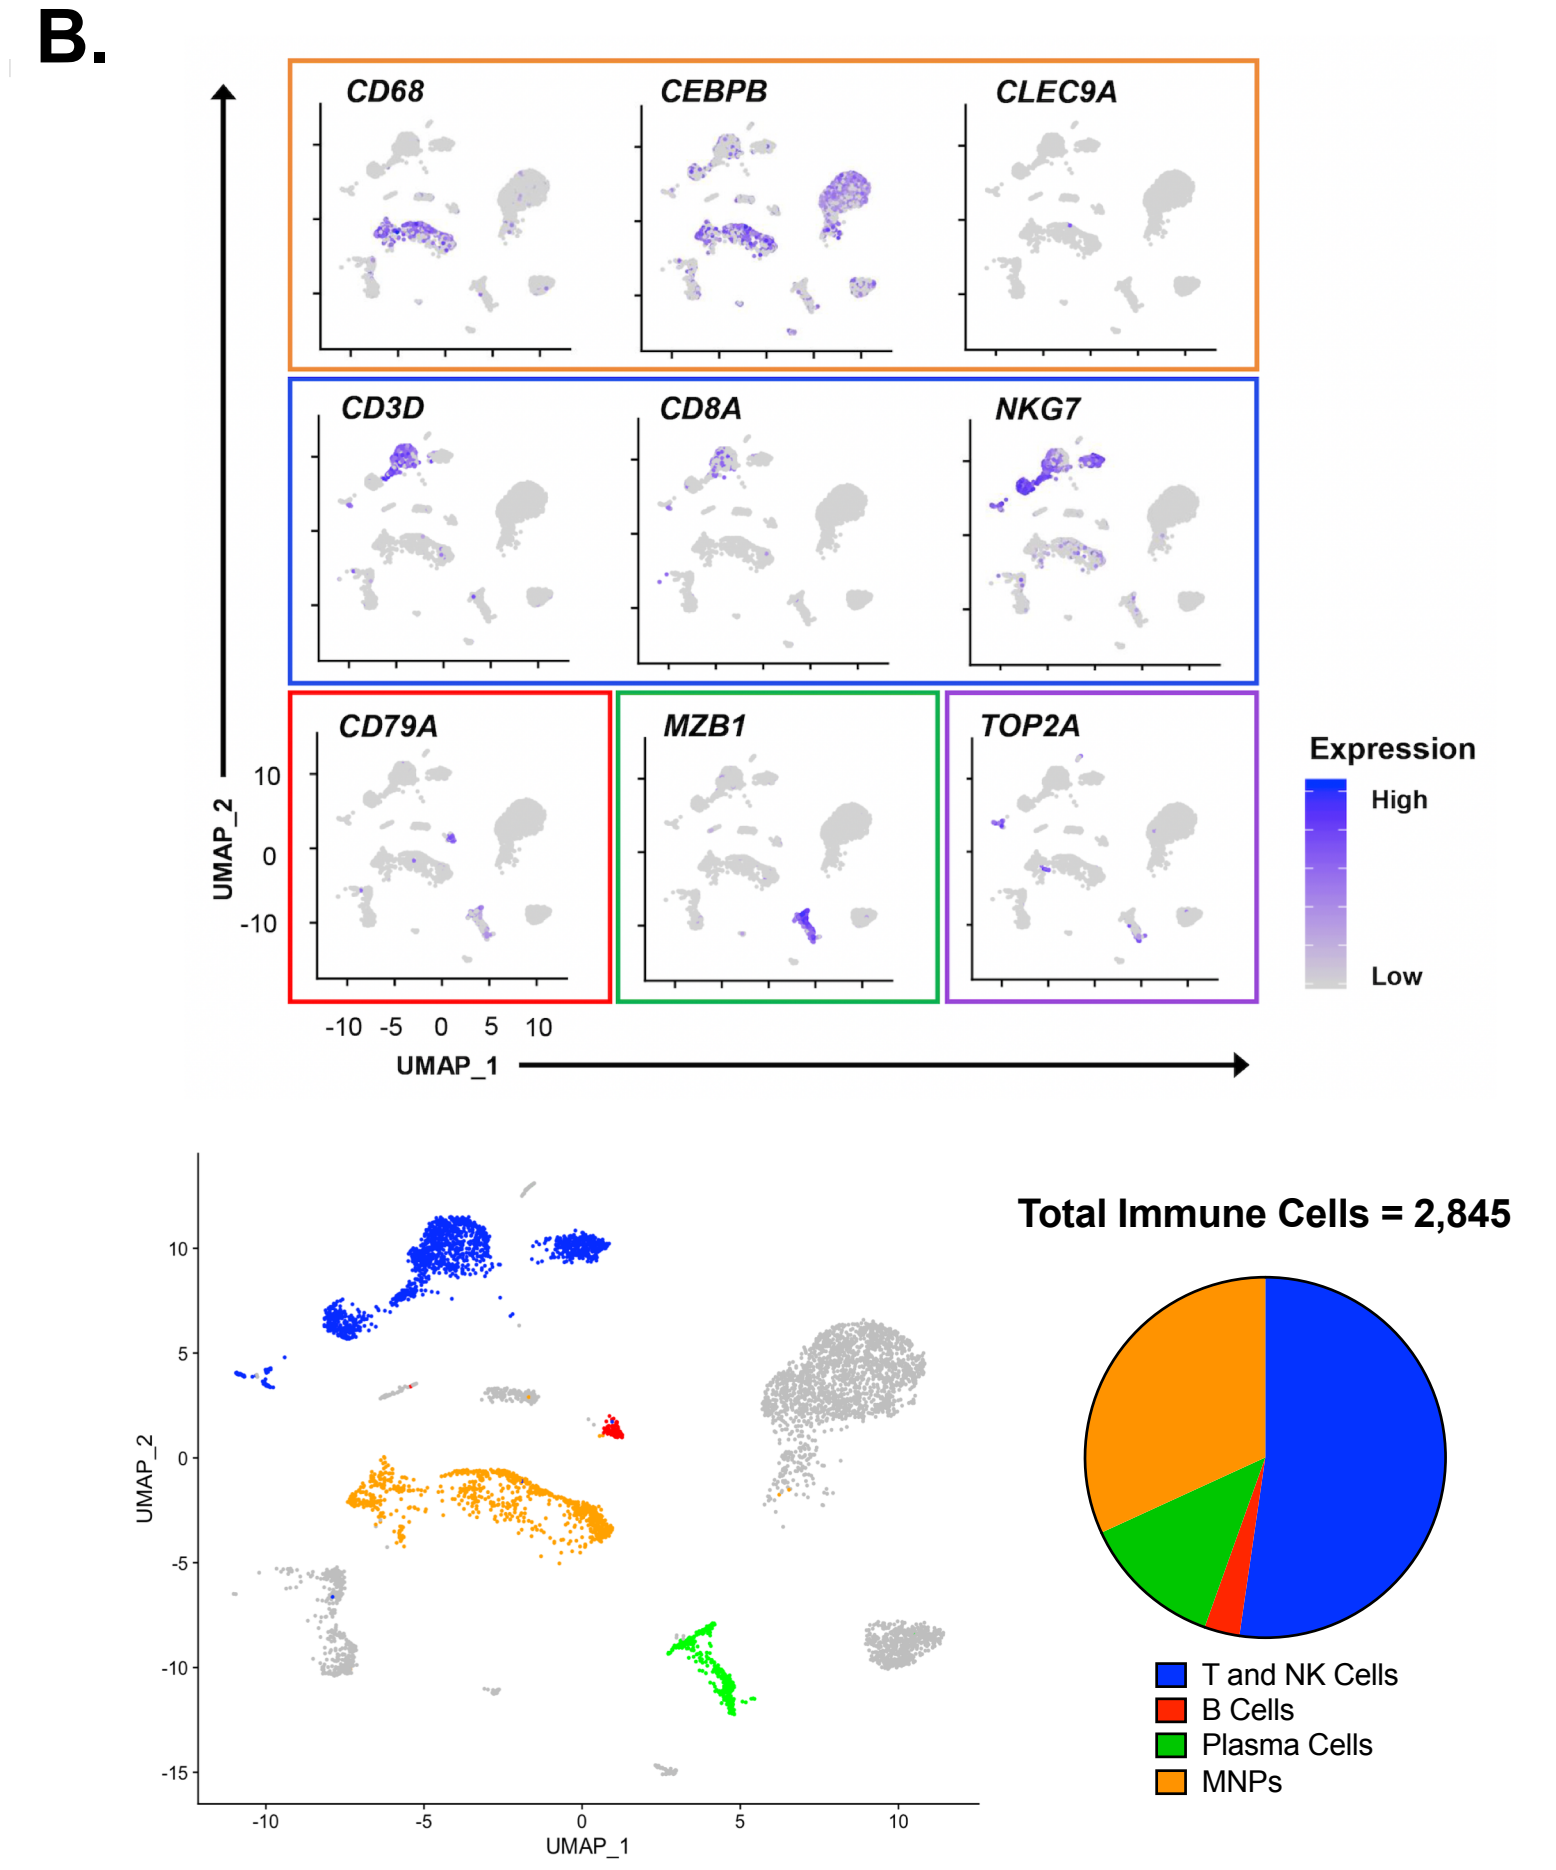

Supplement: pone.0244743.s006.pdf [file pone.0244743.s006.pdf]
