# Supplementary material for: Transcriptional profiling of pediatric cholestatic livers identifies three distinct macrophage populations
Source: PubMed Central journal article supplement (PMC7790256; doi:10.1371/journal.pone.0244743), 2021-01-07

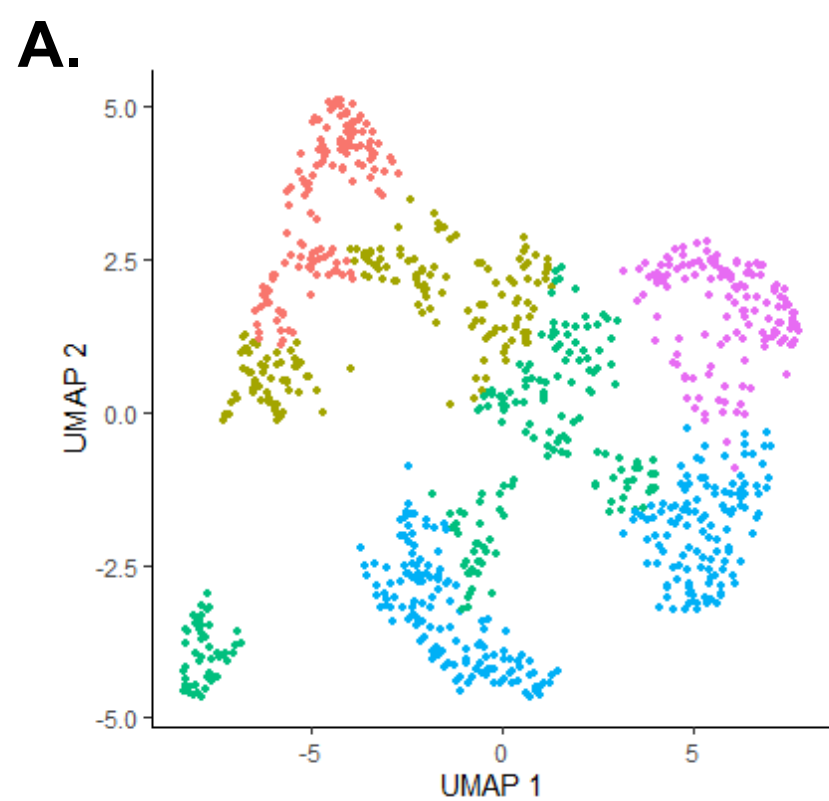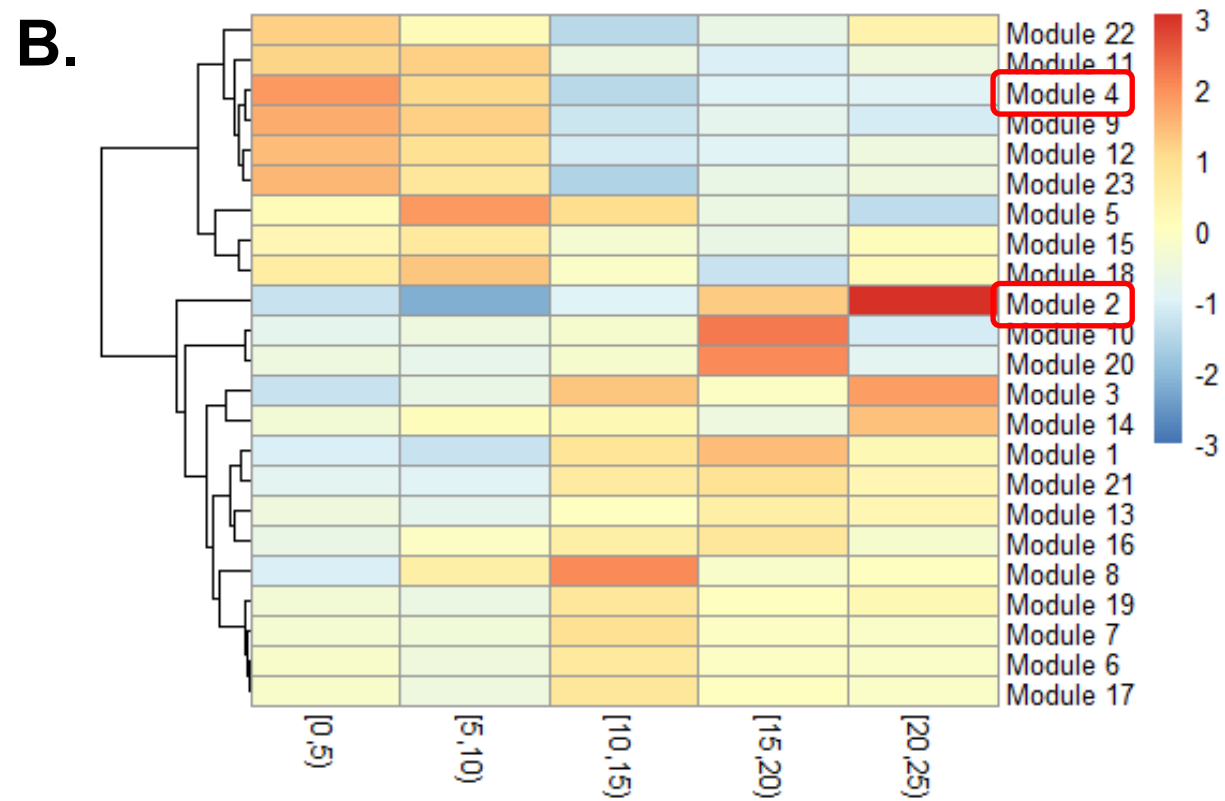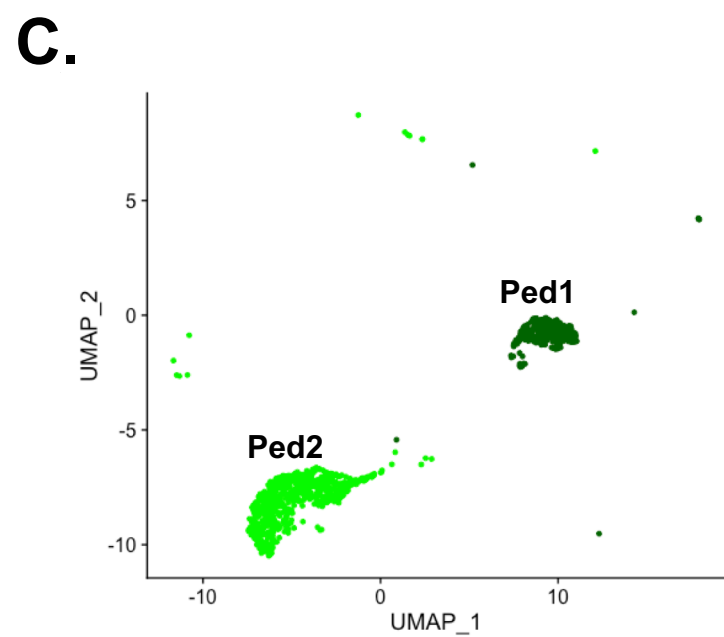

**Non-Inflammatory Module (69 genes)**

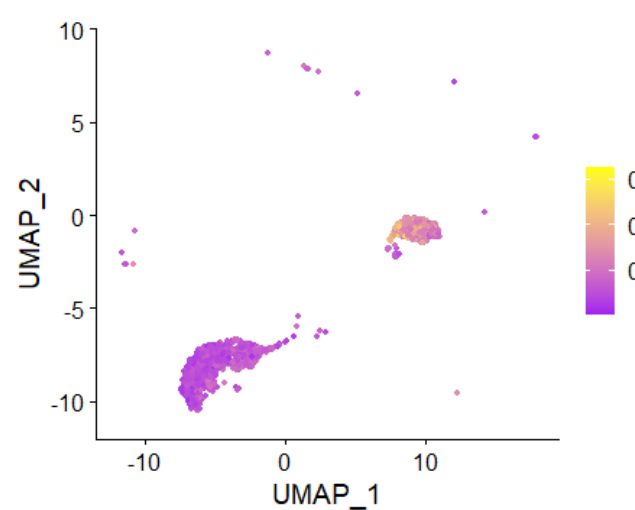

**Inflammatory Module (82 genes)**

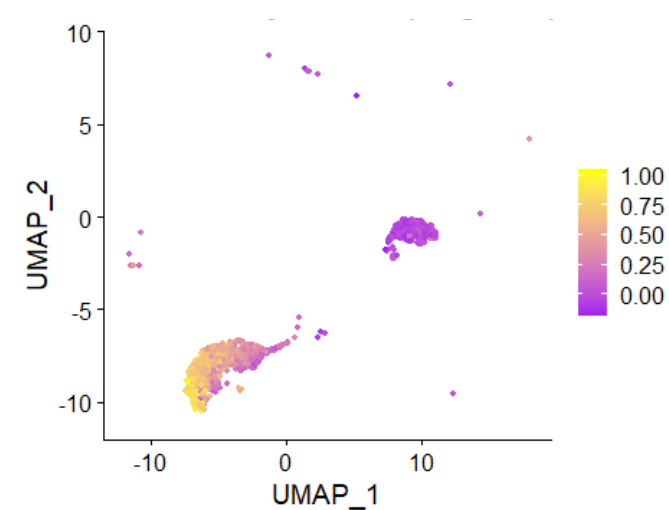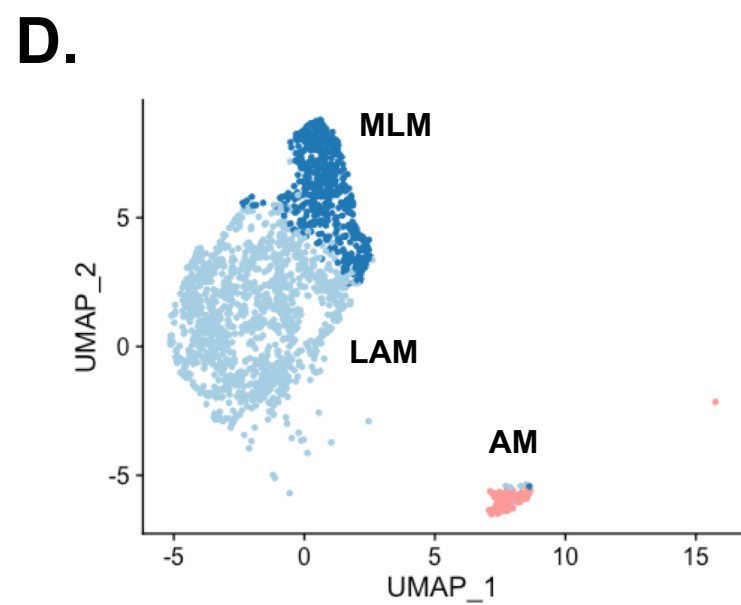

**Non-Inflammatory Module (69 genes)**

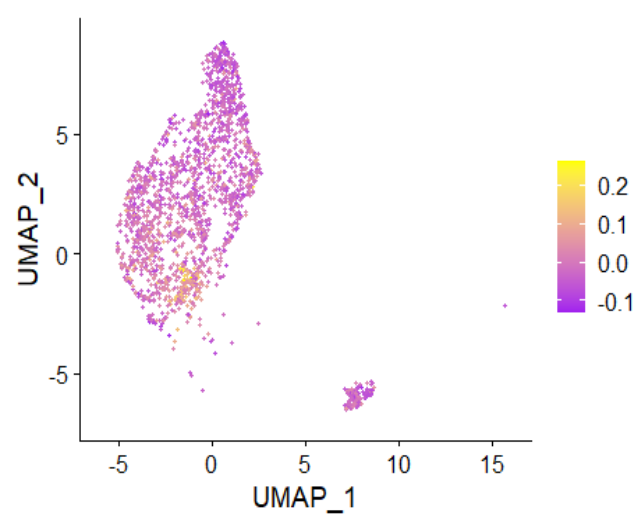

**Inflammatory Module (82 genes)**

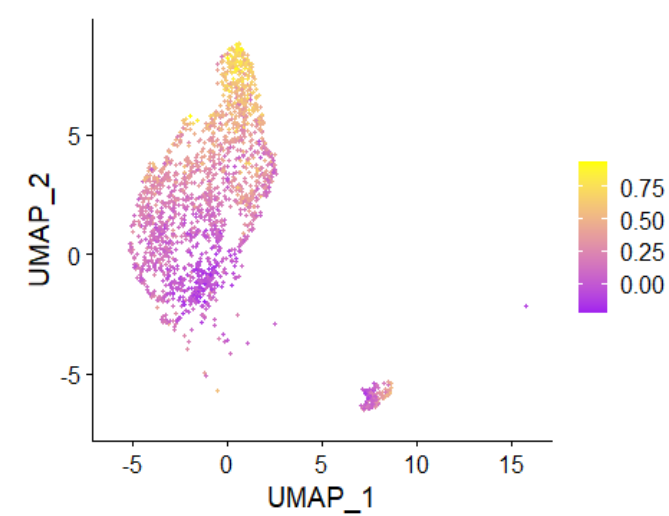

Supplement: pone.0244743.s009.pdf [file pone.0244743.s009.pdf]
